# Supplementary material
Source: PubMed Central journal article supplement (PMC4244584)

**Activation of intestinal human pregnane X receptor protects  
against azoxymethane/dextran sulfate sodium-induced colon  
cancer**

Jie Cheng<sup>#</sup>, Zhong-Ze Fang<sup>#</sup>, Kenjiro Nagaoka, Minoru Okamoto, Aijuan Qu,  
Naoki Tanaka, Shioko Kimura, and Frank J Gonzalez

*Laboratory of Metabolism, Center for Cancer Research, National Cancer Institute,  
National Institutes of Health, Bethesda Maryland, 20892*

## Supplemental Data

**Supplemental Fig. 1** Comparison of survival rates of *PXR*-humanized (hPXR), wild-type (WT) and *Pxr*-null mice after AOM/DSS-induced colon cancer. No significant difference was detected.

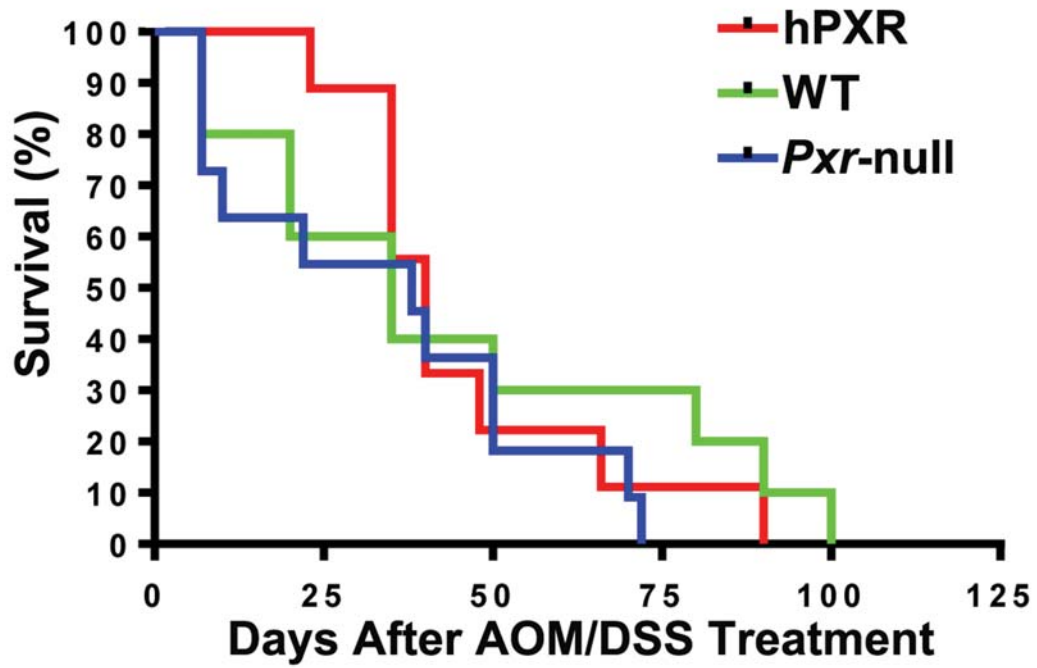

**Supplemental Fig. 2** H&E staining of adenocarcinoma in *PXR*-humanized (hPXR), wild-type (WT) and *Pxr*-null mice treated with AOM/DSS.

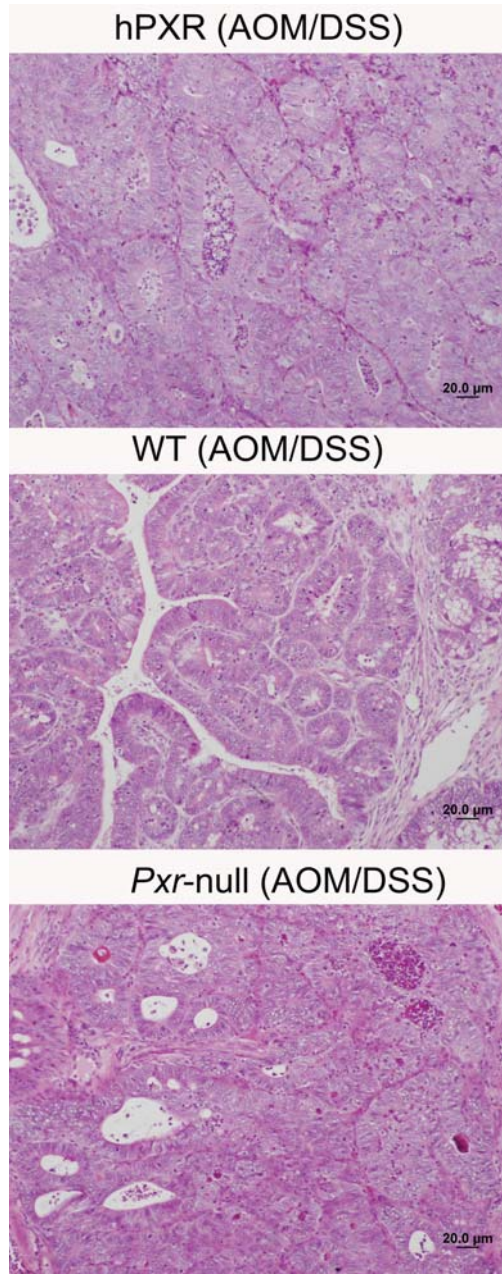

**Supplemental Fig. 3.** Tumor incidence in cohort 2 of *PXR*-humanized (hPXR), wild-type (WT), and *Pxr*-null mice with or without rifaximin treatment in AOM/DSS-induced colon carcinogenesis (n=10 per group). A. Total tumor incidence in hPXR, WT, and *Pxr*-null mice with or without rifaximin treatment in AOM/DSS-induced colon cancer. B. Percentage of tumors with diameter > 4 mm in hPXR, WT, and *Pxr*-null mice with or without rifaximin treatment. C. Percentage of tumors with diameter < 4 mm in hPXR, WT, and *Pxr*-null mice with or without rifaximin treatment.

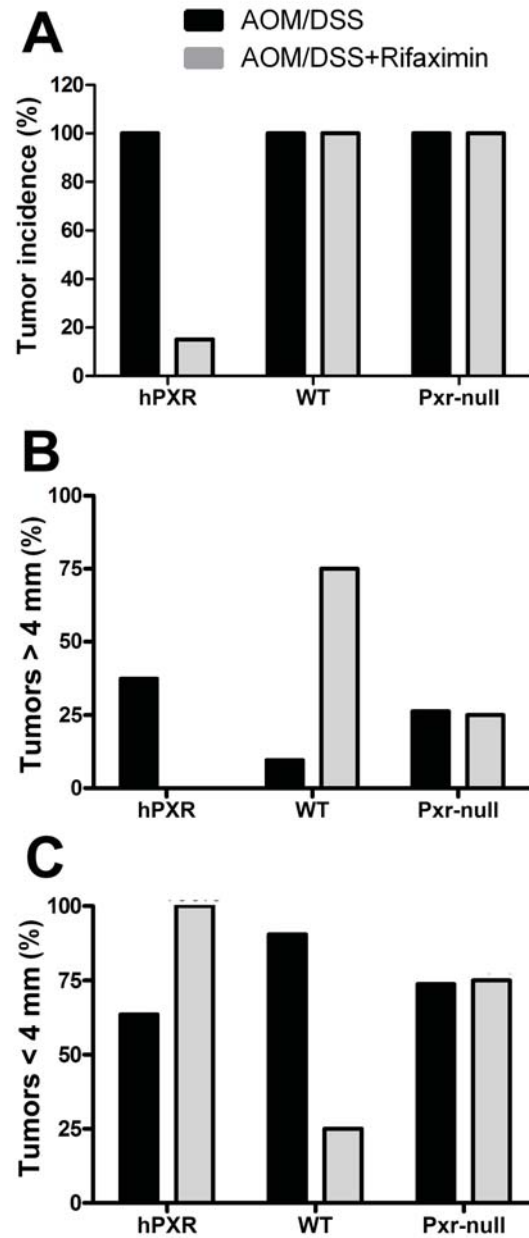

**Supplemental Fig. 4.** Activation of human PXR after treatment with rifaximin for 1 week. The expression of *Cyp3a11* mRNA was determined in *PXR*-humanized (hPXR), wild-type (WT) and *Pxr*-null mice (n=5).\*,  $P < 0.05$ .

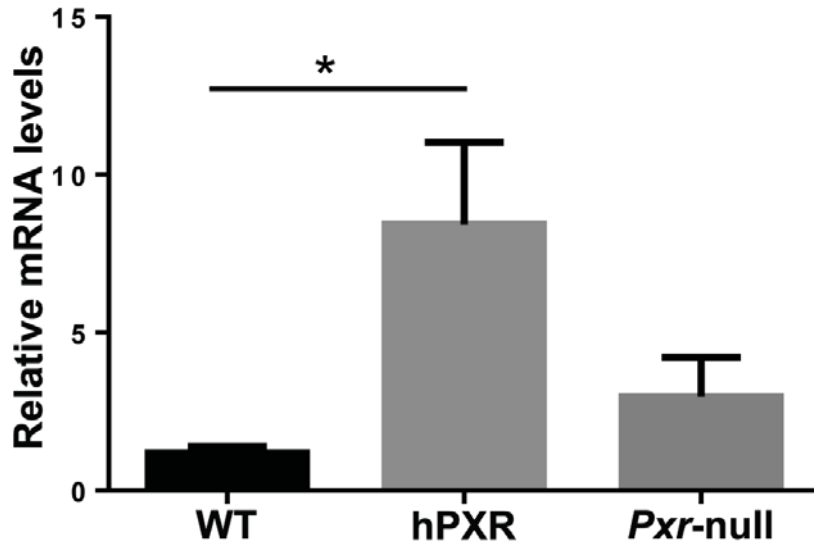

**Supplemental Fig. 5.** Analysis of mRNA and protein to demonstrate the transfection efficiency of human PXR and RXR $\alpha$  expression vector plasmids. (A) qPCR of mRNAs encoding human PXR and human RXR $\alpha$ . Human PXR-Forward: GGCCACTGGCTATCACTTCAA, Reverse: TTCATGGCCCTCCTGAAAA. Human RXR $\alpha$ -Forward: ACCGGAACAGCGCTCACA, Reverse: CTCCGTCTTGTCCATCTGCAT. Note that the primers for human *RXR $\alpha$*  mRNA do not amplify the mouse *Rxr $\alpha$*  mRNA. (B) Western blotting of human PXR in nuclear extracts prepared from *PXR*-humanized (hPXR) and *Pxr*-null mouse livers and PXR/RXR $\alpha$ -transfected HT29 cells. Twenty  $\mu$ g of protein were loaded in each lane. Nuclear extracts from livers of *PXR*-humanized (hPXR) and *Pxr*-null mice were used as a negative and positive control, respectively. The human PXR in liver has a different mobility than the recombinant PXR. The mechanism of this difference is unknown but may be due to splicing differences of the PXR transcript in the liver.

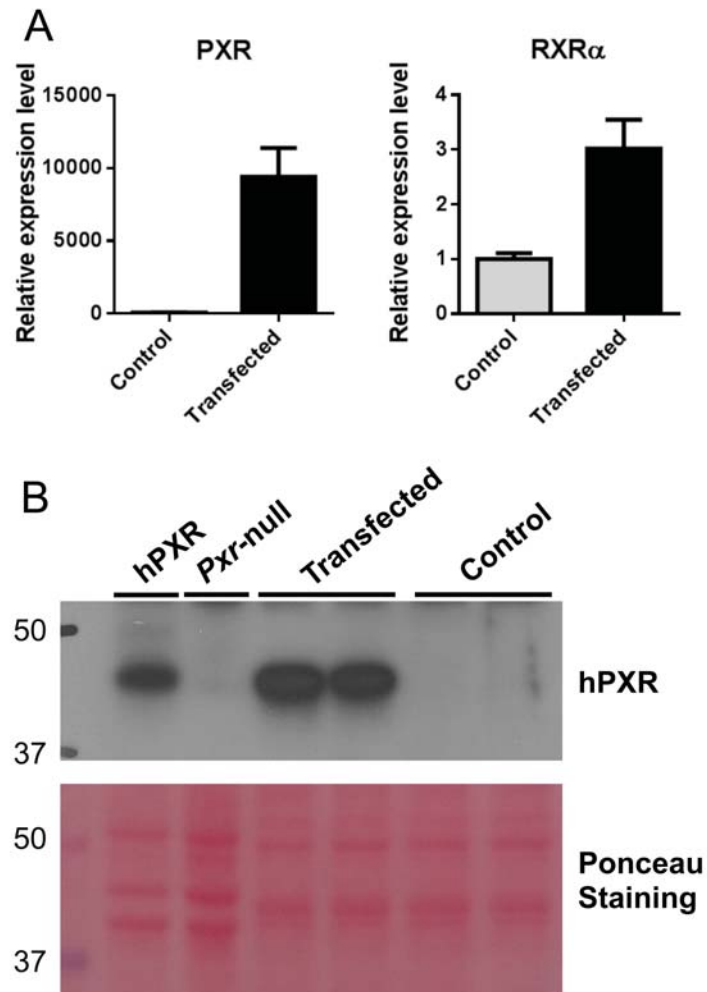

**Supplemental Fig. 6** (A) The apoptosis and cell cycle (% G0/G1) for rifaximin-treated RXR $\alpha$ -transfected cells. (B) Representative flow cytometry data;

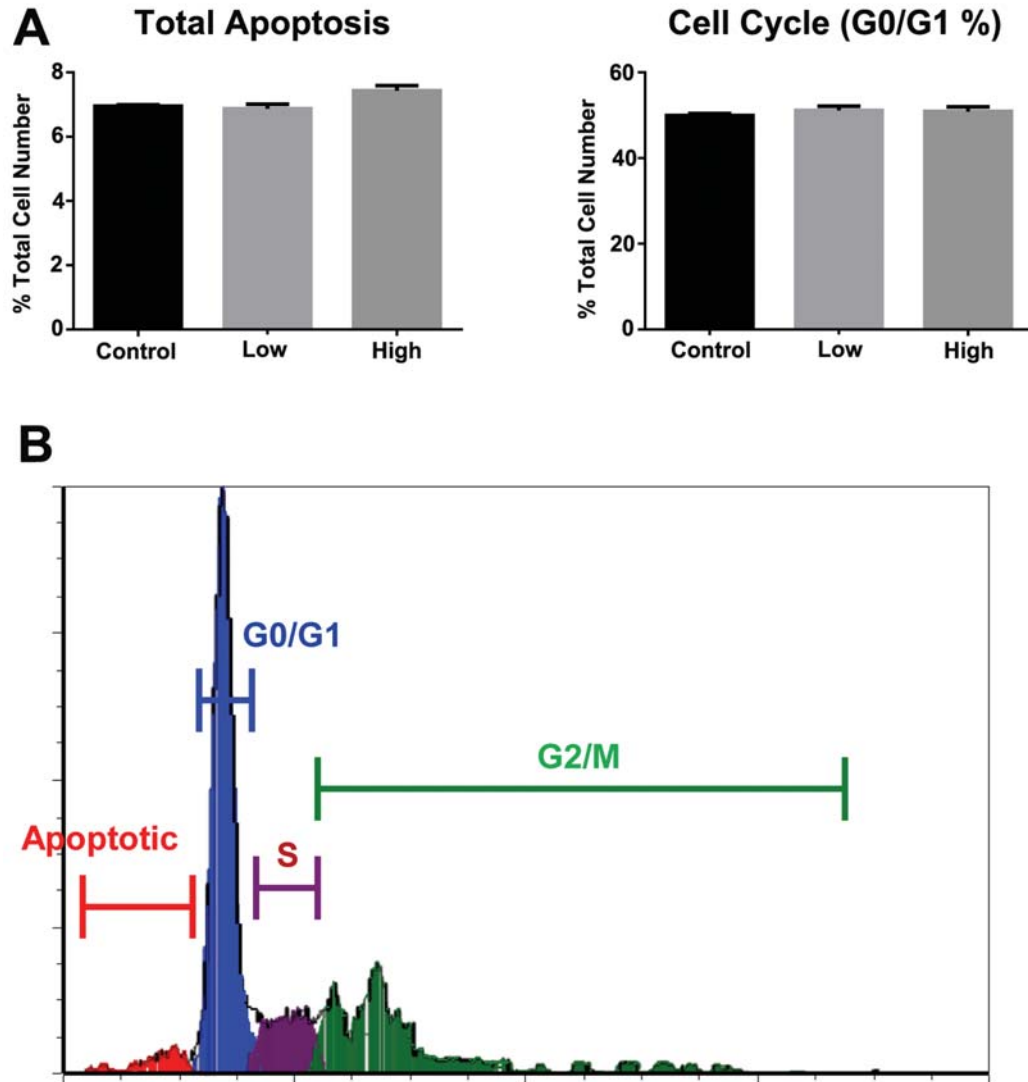

Supplement: supp_114.215913_jpet215913_suppl_figures_revised.pdf [file supp_114.215913_jpet215913_suppl_figures_revised.pdf]
